# Supplementary material for: Dietary Heavy Metal Exposure among Finnish Adults in 2007 and in 2012
Source: MDPI journal article supplement (doi:10.3390/ijerph182010581), 2021-10-09
Supplement: s1 [file s1]

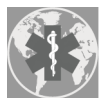

Article

# Dietary Heavy Metal Exposure among Finnish Adults in 2007 and in 2012

Johanna Suomi <sup>1,\*</sup>, Liisa Valsta <sup>2</sup> and Pirkko Tuominen <sup>1</sup>

<sup>1</sup> Risk Assessment Unit, Finnish Food Authority, 00790 Helsinki, Finland; pirkko.tuominen@ruokavirasto.fi

<sup>2</sup> Population Health Unit, Finnish Institute for Health and Welfare, 00271 Helsinki, Finland; liisa.valsta@thl.fi

\* Correspondence: johanna.suomi@ruokavirasto.fi or alias johanna.suomi@foodauthority.fi

**Citation:** Suomi, J.; Valsta, L.;

Tuominen, P. Dietary Heavy Metal Exposure among Finnish Adults in 2007 and in 2012. *Int. J. Environ. Res. Public Health* **2021**, *18*, 10581. <https://doi.org/10.3390/ijerph182010581>

Academic Editor: Martin David Rose

Received: 1 September 2021

Accepted: 7 October 2021

Published: 9 October 2021

**Publisher's Note:** MDPI stays neutral with regard to jurisdictional claims in published maps and institutional affiliations.

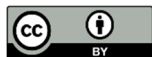

**Copyright:** © 2021 by the authors. Licensee MDPI, Basel, Switzerland. This article is an open access article distributed under the terms and conditions of the Creative Commons Attribution (CC BY) license (<https://creativecommons.org/licenses/by/4.0/>).

### Supplementary Materials

**Table S1.** Sources of cadmium exposure (% of total exposure shown in Table 3) for the average consumer in different age groups and at different years. Consumption data used in the assessment were from the surveys FinDiet 2007 and FinDiet 2012. Results for men and women in the 25- to 45-year (25–45Y) age group in 2012 are presented separately; they are also included in the group 25–64Y for 2012. Middle bound scenario was used for non-detects.

| Food group              | 2007   | 2007   | 2012   | 2012   | 2012       | 2012         |
|-------------------------|--------|--------|--------|--------|------------|--------------|
|                         | 25–64Y | 65–74Y | 25–64Y | 65–74Y | 25–45Y men | 25–45Y women |
| Cereals                 | 32.2   | 36.1   | 31.0   | 33.9   | 31.6       | 30.1         |
| Vegetables              | 14.4   | 14.8   | 15.6   | 17.6   | 13.9       | 15.9         |
| Starchy roots           | 12.5   | 13.8   | 9.1    | 10.9   | 10.2       | 8.4          |
| Legumes, nuts, oilseeds | 3.3    | 3.4    | 3.9    | 2.6    | 3.1        | 4.4          |
| Fruit, berries          | 5.0    | 6.8    | 4.5    | 6.2    | 2.9        | 4.8          |
| Meat and offal          | 4.2    | 5.0    | 4.2    | 4.0    | 3.3        | 3.1          |
| Fish and seafood        | 2.1    | 2.0    | 1.9    | 4.0    | 1.6        | 1.9          |
| Dairy                   | 6.2    | 5.5    | 6.1    | 5.3    | 6.6        | 6.7          |
| Eggs                    | 0.7    | 0.8    | 0.8    | 0.8    | 1.0        | 0.8          |
| Sugar and sweets        | 8.0    | 3.3    | 6.5    | 3.4    | 6.3        | 8.5          |
| Fats and oils           | 0.2    | 0.1    | 0.2    | 0.1    | 0.3        | 0.2          |
| Juices                  | 5.4    | 3.7    | 4.6    | 3.4    | 5.6        | 5.0          |
| Non-alcoholic drinks    | 1.6    | 1.4    | 1.6    | 1.3    | 1.3        | 2.2          |
| Alcohol                 | 0.8    | 0.4    | 0.7    | 0.4    | 0.8        | 0.5          |
| Drinking water          | 0.6    | 0.6    | 0.6    | 0.4    | 0.4        | 0.6          |
| Spices                  | 1.5    | 1.1    | 1.6    | 1.0    | 2.3        | 1.5          |
| Weight loss products    | 0.0    | 0.0    | 0.3    | 0.0    | 0.3        | 0.4          |
| Combination foods       | 0.0    | 0.0    | 6.6    | 4.4    | 8.3        | 4.8          |
| Supplements             | 1.3    | 1.3    | 0.3    | 0.2    | 0.4        | 0.2          |

**Table S2.** Sources of lead exposure (% of total exposure shown in Table 3) for the average consumer in different age groups and at different years. Consumption data used in the assessment were from the surveys FinDiet 2007 and FinDiet 2012. Results for men and women in the 25- to 45-year (25–45Y) age group in 2012 are presented separately; they are also included in the group 25–64Y for 2012. Middle bound scenario was used for non-detects. The concentration data for dairy products were different between the years as no milk samples were above the limit of detection after 2010. That is why the relative importance of dairy is so much lower in 2012.

| Food group              | 2007<br>25–64Y | 2007<br>65–74Y | 2012<br>25–64Y | 2012<br>65–74Y | 2012<br>25–45Y men | 2012<br>25–45Y women |
|-------------------------|----------------|----------------|----------------|----------------|--------------------|----------------------|
| Cereals                 | 17.8           | 20.4           | 15.4           | 18.2           | 16.7               | 15.1                 |
| Vegetables              | 6.1            | 6.6            | 9.1            | 9.8            | 8.8                | 9.0                  |
| Starchy roots           | 3.7            | 4.3            | 3.6            | 4.9            | 3.9                | 3.0                  |
| Legumes, nuts, oilseeds | 1.0            | 0.8            | 2.8            | 2.5            | 2.4                | 2.9                  |
| Fruit, berries          | 6.8            | 9.1            | 8.3            | 14.1           | 4.3                | 7.3                  |
| Meat and offal          | 4.6            | 5.1            | 4.8            | 5.2            | 5.2                | 3.2                  |
| Fish and seafood        | 1.5            | 1.9            | 1.9            | 3.9            | 1.6                | 1.6                  |
| Dairy                   | 17.3           | 18.7           | 4.6            | 3.7            | 4.3                | 4.9                  |
| Eggs                    | 0.0            | 0.0            | 0.0            | 0.0            | 0.0                | 0.0                  |
| Sugar and sweets        | 7.8            | 3.4            | 7.8            | 4.5            | 8.6                | 9.9                  |
| Fats and oils           | 0.3            | 0.5            | 0.4            | 0.6            | 0.5                | 0.3                  |
| Juices                  | 5.4            | 4.0            | 7.5            | 5.9            | 9.2                | 7.8                  |
| Non-alcoholic drinks    | 11.8           | 11.0           | 12.5           | 10.9           | 10.5               | 14.3                 |
| Alcohol                 | 5.3            | 3.5            | 5.4            | 5.3            | 5.9                | 3.0                  |
| Drinking water          | 2.1            | 2.1            | 2.6            | 2.3            | 2.1                | 2.5                  |
| Spices                  | 5.4            | 5.9            | 5.8            | 6.3            | 7.2                | 4.8                  |
| Weight loss products    | 0.3            | 0.1            | 6.4            | 0.7            | 7.4                | 9.4                  |
| Combination foods       | 0.0            | 0.0            | 0.4            | 0.3            | 0.5                | 0.3                  |
| Supplements             | 2.7            | 2.7            | 0.8            | 0.6            | 1.0                | 0.6                  |

**Table S3.** Sources of inorganic arsenic exposure (% of total exposure shown in Table 3) for the average consumer in different age groups and at different years. Consumption data used in the assessment were from the surveys FinDiet 2007 and FinDiet 2012. Results for men and women in the 25- to 45-year (25–45Y) age group in 2012 are presented separately; they are also included in the group 25–64Y for 2012. Middle bound scenario was used for non-detects.

| Food group              | 2007   | 2007   | 2012   | 2012   | 2012       | 2012         |
|-------------------------|--------|--------|--------|--------|------------|--------------|
|                         | 25–64Y | 65–74Y | 25–64Y | 65–74Y | 25–45Y men | 25–45Y women |
| Cereals                 | 14.4   | 18.8   | 14.1   | 16.8   | 13.8       | 14.9         |
| Vegetables              | 7.9    | 5.6    | 7.8    | 8.6    | 6.9        | 8.6          |
| Starchy roots           | 0.0    | 0.0    | 0.0    | 0.0    | 0.0        | 0.0          |
| Legumes, nuts, oilseeds | 0.5    | 0.3    | 0.9    | 0.6    | 0.8        | 1.0          |
| Fruit, berries          | 3.4    | 4.5    | 3.2    | 4.5    | 2.4        | 3.4          |
| Meat and offal          | 3.1    | 3.9    | 3.0    | 3.3    | 3.3        | 2.4          |
| Fish and seafood        | 11.3   | 7.5    | 13.5   | 12.0   | 16.6       | 13.2         |
| Dairy                   | 6.9    | 5.7    | 7.0    | 5.5    | 6.8        | 8.2          |
| Eggs                    | 0.2    | 0.2    | 0.2    | 0.2    | 0.2        | 0.2          |
| Sugar and sweets        | 4.6    | 3.6    | 4.1    | 3.0    | 4.1        | 5.2          |
| Fats and oils           | 2.7    | 3.6    | 2.7    | 3.2    | 2.3        | 2.6          |
| Juices                  | 8.1    | 6.5    | 6.9    | 5.6    | 8.2        | 7.6          |
| Non-alcoholic drinks    | 22.6   | 25.4   | 22.3   | 24.8   | 19.3       | 20.7         |
| Alcohol                 | 4.3    | 1.9    | 3.5    | 2.6    | 4.4        | 2.0          |
| Drinking water          | 3.8    | 4.4    | 3.9    | 3.3    | 3.0        | 4.0          |
| Spices                  | 4.0    | 5.5    | 4.6    | 4.4    | 5.0        | 3.8          |
| Weight loss products    | 0.0    | 0.0    | 0.4    | 0.0    | 0.4        | 0.6          |
| Combination foods       | 0.0    | 0.0    | 1.5    | 1.1    | 1.8        | 1.1          |
| Supplements             | 2.2    | 2.6    | 0.7    | 0.4    | 0.6        | 0.4          |

**Table S4.** Sources of inorganic mercury exposure (% of total exposure shown in Table 3) for the average consumer in different age groups and at different years. Consumption data used in the assessment were from the surveys FinDiet 2007 and FinDiet 2012. Results for men and women in the 25- to 45-year (25–45Y) age group in 2012 are presented separately; they are also included in the group 25–64Y for 2012. Middle bound scenario was used for non-detects.

| Food group              | 2007   | 2007   | 2012   | 2012   | 2012       | 2012         |
|-------------------------|--------|--------|--------|--------|------------|--------------|
|                         | 25–64Y | 65–74Y | 25–64Y | 65–74Y | 25–45Y men | 25–45Y women |
| Cereals                 | 0.8    | 0.3    | 1.1    | 0.7    | 1.4        | 1.3          |
| Vegetables              | 13.5   | 12.2   | 16.0   | 16.4   | 14.8       | 18.0         |
| Starchy roots           | 5.8    | 6.8    | 4.8    | 6.0    | 5.1        | 4.5          |
| Legumes, nuts, oilseeds | 1.0    | 0.9    | 1.4    | 1.0    | 1.3        | 1.6          |
| Fruit, berries          | 5.8    | 6.9    | 5.9    | 7.5    | 3.8        | 6.7          |
| Meat and offal          | 10.6   | 11.5   | 11.0   | 11.3   | 12.2       | 8.2          |
| Fish and seafood        | 20.5   | 30.6   | 21.6   | 28.2   | 17.3       | 14.8         |
| Dairy                   | 0.3    | 0.2    | 0.3    | 0.2    | 0.2        | 0.4          |
| Eggs                    | 0.0    | 0.0    | 0.0    | 0.0    | 0.0        | 0.0          |
| Sugar and sweets        | 6.4    | 5.6    | 7.0    | 5.9    | 6.0        | 8.9          |
| Fats and oils           | 1.4    | 1.4    | 1.5    | 1.5    | 1.5        | 1.6          |
| Juices                  | 18.9   | 12.2   | 18.6   | 13.1   | 22.9       | 23.0         |
| Non-alcoholic drinks    | 2.0    | 0.5    | 2.2    | 1.1    | 3.4        | 3.0          |
| Alcohol                 | 3.0    | 1.0    | 2.6    | 1.7    | 3.5        | 1.5          |
| Drinking water          | 0.8    | 0.8    | 0.8    | 0.7    | 0.7        | 1.2          |
| Spices                  | 5.4    | 5.8    | 4.1    | 4.0    | 4.3        | 4.2          |
| Weight loss products    | 0.0    | 0.0    | 0.1    | 0.0    | 0.1        | 0.2          |
| Combination foods       | 0.0    | 0.0    | 0.2    | 0.1    | 0.3        | 0.2          |
| Supplements             | 3.7    | 3.4    | 0.8    | 0.6    | 1.1        | 0.8          |

**Table S5.** Sources of nickel exposure (% of total exposure shown in Table 3) for the average consumer in different age groups and at different years. Consumption data used in the assessment were from the surveys FinDiet 2007 and FinDiet 2012. Results for men and women in the 25- to 45-year (25–45Y) age group in 2012 are presented separately; they are also included in the group 25–64Y for 2012. Middle bound scenario was used for non-detects.

| Food group              | 2007   | 2007   | 2012   | 2012   | 2012       | 2012         |
|-------------------------|--------|--------|--------|--------|------------|--------------|
|                         | 25–64Y | 65–74Y | 25–64Y | 65–74Y | 25–45Y men | 25–45Y women |
| Cereals                 | 22.6   | 32.9   | 20.1   | 25.5   | 21.1       | 18.8         |
| Vegetables              | 7.2    | 7.6    | 8.1    | 9.4    | 7.1        | 7.7          |
| Starchy roots           | 4.7    | 5.8    | 3.7    | 4.8    | 4.3        | 3.1          |
| Legumes, nuts, oilseeds | 8.4    | 6.3    | 15.3   | 11.5   | 13.9       | 15.3         |
| Fruit, berries          | 9.4    | 11.3   | 9.4    | 12.4   | 6.2        | 9.5          |
| Meat and offal          | 3.1    | 2.9    | 3.1    | 2.9    | 4.0        | 2.8          |
| Fish and seafood        | 0.4    | 0.6    | 0.4    | 0.7    | 0.4        | 0.3          |
| Dairy                   | 8.3    | 8.3    | 8.5    | 8.1    | 9.0        | 9.2          |
| Eggs                    | 0.2    | 0.2    | 0.3    | 0.3    | 0.3        | 0.3          |
| Sugar and sweets        | 16.1   | 5.8    | 12.1   | 5.6    | 12.7       | 15.0         |
| Fats and oils           | 6.2    | 7.4    | 6.1    | 7.1    | 5.9        | 5.7          |
| Juices                  | 4.2    | 3.0    | 3.1    | 2.5    | 4.0        | 3.1          |
| Non-alcoholic drinks    | 6.2    | 5.4    | 6.3    | 6.5    | 6.6        | 6.2          |
| Alcohol                 | 0.7    | 0.5    | 0.6    | 0.6    | 0.8        | 0.3          |
| Drinking water          | 0.7    | 0.7    | 0.7    | 0.6    | 0.6        | 0.7          |
| Spices                  | 1.1    | 1.1    | 1.6    | 1.2    | 2.2        | 1.3          |
| Weight loss products    | 0.0    | 0.0    | 0.2    | 0.0    | 0.3        | 0.3          |
| Combination foods       | 0.0    | 0.0    | 0.4    | 0.2    | 0.5        | 0.3          |
| Supplements             | 0.3    | 0.3    | 0.1    | 0.1    | 0.1        | 0.1          |

**Table S6.** Sources of methyl mercury exposure (% of total exposure shown in Table 3) for the average consumer in different age groups and at different years. Consumption data used in the assessment were from the surveys FinDiet 2007 and FinDiet 2012. Results for men and women in the 25- to 45-year (25–45Y) age group in 2012 are presented separately; they are also included in the group 25–64Y for 2012. Middle bound scenario was used for non-detects. As methyl mercury was assumed to be present only in fish and seafood, results are shown at higher detail than in Tables S1–S5.

| Species                 | 2007   | 2007   | 2012   | 2012   | 2012       | 2012         |
|-------------------------|--------|--------|--------|--------|------------|--------------|
|                         | 25–64Y | 65–74Y | 25–64Y | 65–74Y | 25–45Y men | 25–45Y women |
| <b>Perch</b>            | 1.7    | 8.1    | 5.8    | 4.2    | 2.4        | 0.0          |
| <b>Pike</b>             | 15.7   | 17.3   | 14.5   | 5.3    | 8.9        | 0.0          |
| <b>Rainbow trout</b>    | 13.0   | 10.8   | 13.7   | 13.8   | 16.7       | 23.1         |
| <b>Salmon</b>           | 3.2    | 3.2    | 6.8    | 5.8    | 5.8        | 10.4         |
| <b>Average fish (*)</b> | 37.3   | 44.7   | 28.6   | 50.9   | 28.3       | 15.8         |
| <b>Vendace</b>          | 3.5    | 5.5    | 7.7    | 4.8    | 9.4        | 2.9          |
| <b>Saithe</b>           | 4.9    | 2.5    | 4.7    | 2.4    | 6.6        | 8.6          |
| <b>Tuna</b>             | 14.1   | 1.9    | 9.8    | 6.1    | 13.0       | 27.3         |
| <b>Other fish</b>       | 4.1    | 5.7    | 6.1    | 5.4    | 4.9        | 7.3          |
| <b>Roe</b>              | 0.1    | 0.1    | 0.2    | 0.2    | 0.1        | 0.2          |
| <b>Molluscs</b>         | 0.2    | 0.0    | 0.1    | 0.3    | 0.1        | 0.4          |
| <b>Crustaceans</b>      | 2.0    | 0.3    | 2.0    | 0.8    | 3.8        | 4.0          |

(\*) Not identified by species in the consumption data, calculated as mixture of perch, pike, vendace and Baltic herring in the nutritional assessments. In the current study, a mixture of 1:1:1:1 was assumed.

**Table S7.** Sources of exposure for the high consumer (95<sup>th</sup> percentile) in the age group 25 to 64 years, according to consumption data from FinDiet 2012. Middle bound scenario was used for non-detects. At this food grouping level, methyl mercury would be 100% from fish and seafood.

| Food group              | Cd   | Pb   | inorg. As | inorg. Hg | Ni   |
|-------------------------|------|------|-----------|-----------|------|
| Cereals                 | 13.4 | 4.0  | 4.3       | 0.2       | 6.3  |
| Vegetables              | 6.8  | 3.5  | 17.1      | 10.9      | 2.7  |
| Starchy roots           | 3.5  | 0.8  | 0.0       | 1.6       | 0.8  |
| Legumes, nuts, oilseeds | 9.5  | 1.9  | 0.2       | 0.4       | 62.9 |
| Fruit, berries          | 2.2  | 2.6  | 1.0       | 2.4       | 4.6  |
| Meat and offal          | 12.1 | 1.1  | 0.4       | 7.9       | 0.7  |
| Fish and seafood        | 0.9  | 0.4  | 60.2      | 53.2      | 0.1  |
| Dairy                   | 2.6  | 7.3  | 1.9       | 0.0       | 2.4  |
| Eggs                    | 0.3  | 0.0  | 0.0       | 0.0       | 0.1  |
| Sugar and sweets        | 6.8  | 5.0  | 0.8       | 1.4       | 12.1 |
| Fats and oils           | 0.1  | 0.1  | 0.5       | 0.5       | 1.3  |
| Juices                  | 2.9  | 3.8  | 1.5       | 17.8      | 0.9  |
| Non-alcoholic drinks    | 0.8  | 11.9 | 3.5       | 0.9       | 4.0  |
| Alcohol                 | 0.3  | 2.5  | 1.1       | 0.7       | 0.1  |
| Drinking water          | 0.2  | 1.1  | 0.7       | 0.2       | 0.2  |
| Spices                  | 0.6  | 1.5  | 4.9       | 1.4       | 0.2  |
| Weight loss products    | 0.1  | 50.7 | 0.1       | 0.0       | 0.3  |
| Combination foods       | 36.9 | 0.2  | 0.3       | 0.1       | 0.3  |
| Supplements             | 0.1  | 1.4  | 1.5       | 0.3       | 0.0  |



**Table S8.** Mean dietary exposure ( $\mu\text{g/kg bw/d}$ ) according to middle bound estimate in different age groups of FinDiet 2007 and FinDiet 2012 surveys, separated by gender. For the FinDiet 2012 survey, lead exposure was estimated with milk occurrence data from 2006 onwards, while the exposure for the older survey was estimated with some older numerical data included. For comparison between the years, the indicative lead exposure estimated with the milk occurrence data of 2006 onwards is also shown for the 2007 consumption.

| Year | Gender | Age group | Cd    | Pb (old data) | Pb    | iAs   | iHg   | MeHg  | Ni    |
|------|--------|-----------|-------|---------------|-------|-------|-------|-------|-------|
| 2007 | FEMALE | 25–34     | 0.164 | 0.256         | 0.224 | 0.185 | 0.034 | 0.023 | 2.939 |
|      | MALE   |           | 0.155 | 0.210         | 0.172 | 0.186 | 0.035 | 0.014 | 2.421 |
| 2012 | FEMALE |           | 0.183 | -             | 0.204 | 0.214 | 0.036 | 0.024 | 3.169 |
|      | MALE   |           | 0.176 | -             | 0.190 | 0.223 | 0.038 | 0.029 | 2.507 |
| 2007 | FEMALE | 35–44     | 0.151 | 0.200         | 0.175 | 0.175 | 0.033 | 0.029 | 2.756 |
|      | MALE   |           | 0.143 | 0.186         | 0.158 | 0.177 | 0.035 | 0.028 | 2.241 |
| 2012 | FEMALE |           | 0.154 | -             | 0.189 | 0.186 | 0.030 | 0.017 | 2.544 |
|      | MALE   |           | 0.151 | -             | 0.163 | 0.177 | 0.034 | 0.026 | 2.425 |
| 2007 | FEMALE | 45–54     | 0.141 | 0.182         | 0.162 | 0.171 | 0.034 | 0.038 | 2.582 |
|      | MALE   |           | 0.135 | 0.194         | 0.164 | 0.172 | 0.032 | 0.027 | 2.243 |
| 2012 | FEMALE |           | 0.160 | -             | 0.161 | 0.195 | 0.035 | 0.035 | 2.655 |
|      | MALE   |           | 0.145 | -             | 0.144 | 0.175 | 0.039 | 0.050 | 2.173 |
| 2007 | FEMALE | 55–64     | 0.134 | 0.168         | 0.148 | 0.162 | 0.032 | 0.033 | 2.412 |
|      | MALE   |           | 0.125 | 0.163         | 0.137 | 0.168 | 0.034 | 0.045 | 2.066 |
| 2012 | FEMALE |           | 0.140 | -             | 0.147 | 0.156 | 0.031 | 0.041 | 2.602 |
|      | MALE   |           | 0.143 | -             | 0.137 | 0.164 | 0.033 | 0.042 | 2.492 |
| 2007 | FEMALE | 65–74     | 0.122 | 0.158         | 0.132 | 0.123 | 0.032 | 0.052 | 2.119 |
|      | MALE   |           | 0.126 | 0.169         | 0.142 | 0.134 | 0.032 | 0.042 | 2.058 |
| 2012 | FEMALE |           | 0.136 | -             | 0.128 | 0.154 | 0.030 | 0.034 | 2.350 |
|      | MALE   |           | 0.133 | -             | 0.125 | 0.138 | 0.034 | 0.050 | 2.025 |

**Table S9.** Limits of quantification (LOQ), in mg/kg, of the analysis methods used for the occurrence data in Finland. All of the analyses were performed with validated laboratory methods. If the value is given as “or”, the method is validated for more than one analysis equipment of same description but with different LOQ, or the data are from several laboratories. Dash (-) signifies the analysis method had not been used for this heavy metal in the occurrence dataset used in the article.

| Analysis method     | Matrix                                           | Cd                     | Pb                    | As                     | Hg            | Ni   | Al          |
|---------------------|--------------------------------------------------|------------------------|-----------------------|------------------------|---------------|------|-------------|
| AAS                 | Foodstuffs of animal origin                      | 0.001                  | 0.01                  | -                      | 0.001         | 0.02 | -           |
| AAS (graphite oven) | Foodstuffs of animal origin or plant-based foods | -                      | -                     | -                      | 0.05 or 0.005 | -    | -           |
| ICP-MS              | Foodstuffs of animal origin                      | 0.01 or 0.001          | 0.01                  | 0.01 or 0.005 or 0.001 | -             | 0.02 | 0.20        |
| ICP-MS              | Plant-based foodstuffs                           | 0.01 or 0.001          | 0.05 or 0.02 or 0.005 | 0.01                   | -             | 0.02 | 2.0         |
| ICP-MS              | Cereal products                                  | 0.01 or 0.005 or 0.001 | 0.05 or 0.02 or 0.005 | 0.02                   | -             | 0.10 | 5.0 (pasta) |
| HPLC-ICP-MS         | Rice                                             | -                      | -                     | 0.04 (iAs)             | -             | -    | -           |
